# Supplementary material for: Genome-Wide Identification, 3D Modeling, Expression and Enzymatic Activity Analysis of Cell Wall Invertase Gene Family from Cassava (Manihot esculenta Crantz)
Source: PubMed Central journal article supplement (PMC4057674; doi:10.3390/ijms15057313), 2014-04-28
Supplement: ijms-15-07313-s001.pdf [file ijms-15-07313-s001.pdf]

## Supplementary Information

**Table S1.** Identity analysis of the six cell wall invertase coding sequences and their predicted amino acid in cassava.

| Amino acid<br>identity | Nucleotides identity |                 |                 |                 |                 |                 |
|------------------------|----------------------|-----------------|-----------------|-----------------|-----------------|-----------------|
|                        | <i>MeCWINV1</i>      | <i>MeCWINV2</i> | <i>MeCWINV3</i> | <i>MeCWINV4</i> | <i>MeCWINV5</i> | <i>MeCWINV6</i> |
| MeCWINV1               | -                    | 56.90%          | 59.86%          | 60.00%          | 57.41%          | 57.82%          |
| MeCWINV2               | 48.25%               | -               | 60.64%          | 59.01%          | 86.77%          | 81.70%          |
| MeCWINV3               | 53.16%               | 57.80%          | -               | 82.96%          | 61.19%          | 59.83%          |
| MeCWINV4               | 52.65%               | 53.60%          | 77.93%          | -               | 60.10%          | 58.50%          |
| MeCWINV5               | 50.83%               | 80.38%          | 57.98%          | 54.42%          | -               | 79.47%          |
| MeCWINV6               | 50.58%               | 77.78%          | 55.31%          | 51.11%          | 74.70%          | -               |

© 2014 by the authors; licensee MDPI, Basel, Switzerland. This article is an open access article distributed under the terms and conditions of the Creative Commons Attribution license (<http://creativecommons.org/licenses/by/3.0/>).
